# Supplementary material for: MoaE Is Involved in Response to Oxidative Stress in Deinococcus radiodurans
Source: MDPI journal article supplement (doi:10.3390/ijms24032441), 2023-01-26
Supplement: s1 [file s1]

## Supplementary Materials

### MoaE is involved in response to oxidative stress in *Deinococcus radiodurans*

**Supplementary Table S1. Data collection, phasing and refinement statistics of DrMoaE crystal diffraction.**

|                                                     | DrMoaE            |
|-----------------------------------------------------|-------------------|
| <b>Data collection</b>                              |                   |
| Space group                                         | C222 <sub>1</sub> |
| Cell dimensions                                     |                   |
| <i>a</i> , <i>b</i> , <i>c</i> (Å)                  | 62.02             |
|                                                     | 94.95             |
|                                                     | 101.11            |
| Wavelength (Å)                                      | 0.9792            |
| Resolution (Å)                                      | 30.0-2.00         |
| <i>R</i> <sub>sym</sub> (%)                         | 5.7 (56.0)        |
| <i>I</i> /σ <i>I</i>                                | 16.5 (2.9)        |
| Completeness (%)                                    | 99.9 (100.0)      |
| Redundancy                                          | 6.4 (6.7)         |
| <b>Refinement</b>                                   |                   |
| Resolution (Å)                                      | 30.0-2.00         |
| No. reflections                                     | 20510             |
| <i>R</i> <sub>work</sub> / <i>R</i> <sub>free</sub> | 19.4/23.6         |
| No. atoms                                           |                   |
| Protein                                             | 2121              |
| Ligand                                              | 10                |
| Solvent                                             | 77                |
| B-factors                                           |                   |
| Protein                                             | 51.8              |
| Ligand                                              | 56.6              |
| Solvent                                             | 45.9              |
| R.m.s deviations                                    |                   |
| Bond lengths (Å)                                    | 0.005             |
| Bond angles (°)                                     | 0.74              |

\*Highest resolution shell is shown in parenthesis.

**Supplementary Table S2. Strains and plasmids used in this experiment.**

| Strains                   | Relevant characteristics                                             | Reference or source |
|---------------------------|----------------------------------------------------------------------|---------------------|
| <i>D. radiodurans</i>     |                                                                      |                     |
| DraR1 wt                  | Wild-type strain ATCC13939                                           | Laboratory stock    |
| $\Delta drmoaE$           | R1 but <i>drmoaE::str</i>                                            | This study          |
| $\Delta drmoaE\_Cwt$      | $\Delta drmoaE$ but pRADK:: <i>drmoaE</i>                            | This study          |
| $\Delta drmoaE\_R110A$    | $\Delta drmoaE$ but pRADK:: <i>drmoaER110A</i>                       | This study          |
| <i>Escherichia coli</i>   |                                                                      |                     |
| DH5 $\alpha$              | Cloning strain                                                       | TransGen            |
| BL21 (DE3)                | Expression strain                                                    | TransGen            |
| <b>plasmids</b>           |                                                                      |                     |
| pET28a                    | T7 promoter, T7 terminator, Kana, 6 $\times$ His-tag coding sequence | Novagen             |
| pET28aMoaE                | pET28a containing wild type <i>moaE</i> gene                         | This study          |
| pET28aMoaE R110A          | pET28a containing <i>moaE</i> site mutation R110A gene               | This study          |
| PRADK                     | <i>E. coli-D. radiodurans</i> shuttle vector                         | Laboratory stock    |
| pRADK- <i>drmoaE</i>      | pRADK:: <i>drmoaE</i>                                                | This study          |
| pRADK- <i>drmoaER110A</i> | pRADK:: <i>drmoaER110A</i>                                           | This study          |

**Supplementary Table S3. Primers used in this experiment.**

| Primers                                             | Sequence (5'-3')                        |
|-----------------------------------------------------|-----------------------------------------|
| <b>Expression of proteins</b>                       |                                         |
| <i>moaE</i> -F (NdeI)                               | TTTTTTT <u>CATATG</u> ATGGCCCCGAGGACGAG |
| <i>moaE</i> -R (BamHI)                              | TTTGGATCCTCACAGCGTGTCGTGGCC             |
| <i>moaER110A</i> -F                                 | GCGCCGGGCGGGCGTGGGGGCTTG                |
| <i>moaER110A</i> -R                                 | CAAGCCCCACGCCCGCCCGGCGC                 |
| <b>Construction and complement of mutant stains</b> |                                         |
| <i>moaE</i> -P1                                     | GTCGCTGGCCCCAAATTTCT                    |
| <i>moaE</i> -P2 (HindIII)                           | TTTAAGCTTACCGCCCGCCACCGG                |
| <i>moaE</i> -P3 (BamHI)                             | TTTGGATCCGACTTCGGTAAAAACGCTGTCCTGT      |
| <i>moaE</i> -P4                                     | GTTTTACCCGCCGCACGC                      |
| <i>moaE</i> -P5                                     | ACGCGGACACCCACTGCC                      |
| <i>moaE</i> -P6                                     | GGTGGGGGCTTGCGACAC                      |
| $\Delta moaE\_Cwt$ -F                               | TTTTTTT <u>CATATG</u> ATGGCCCCGAGGACGAG |
| $\Delta moaE\_Cwt$ -R                               | TTTGGATCCTCACAGCGTGTCGTGGCC             |
| <b>Real time PCR primers</b>                        |                                         |
| <i>moaE</i> -RTF                                    | ACGCGGACACCCACTGCC                      |
| <i>moaE</i> -RTR                                    | GGTGGGGGCTTGCGACAC                      |
| <i>drxdhB</i> -RTF                                  | AGGGCGAGTTCGAGTTCGGC                    |
| <i>drxdhB</i> -RTR                                  | CTCAGAAVGGCTCCAAGCGC                    |
| <i>dr_0397</i> -RT-F                                | TTGATTGAGTGGCCCCGAGAT                   |
| <i>dr_0397</i> -RT-R                                | GTAGTGGACCGTCTTGGCACAG                  |
| <i>dr_1343</i> -RT-F                                | GAAAGTAGGCATCAACGGCTTT                  |
| <i>dr_1343</i> -RT-R                                | TCCACGGTGCCGTCAAAG                      |

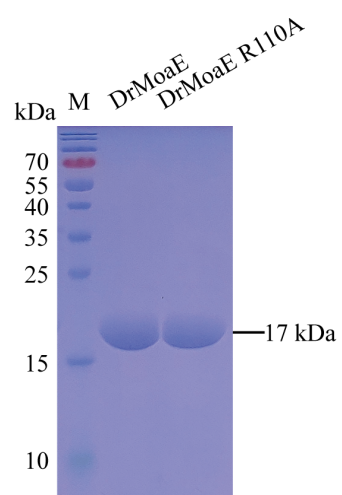

**Supplementary Figure S1. The SDS-PAGE (15%) analysis of DrMoaE and DrMoaER110A.**
